# Supplementary material
Source: Copernicus journal article supplement (doi:10.5194/egqsj-26-131-1975)
Supplement: Supplementary file 1 [file egqsj-26-131-1975-supplement.pdf]

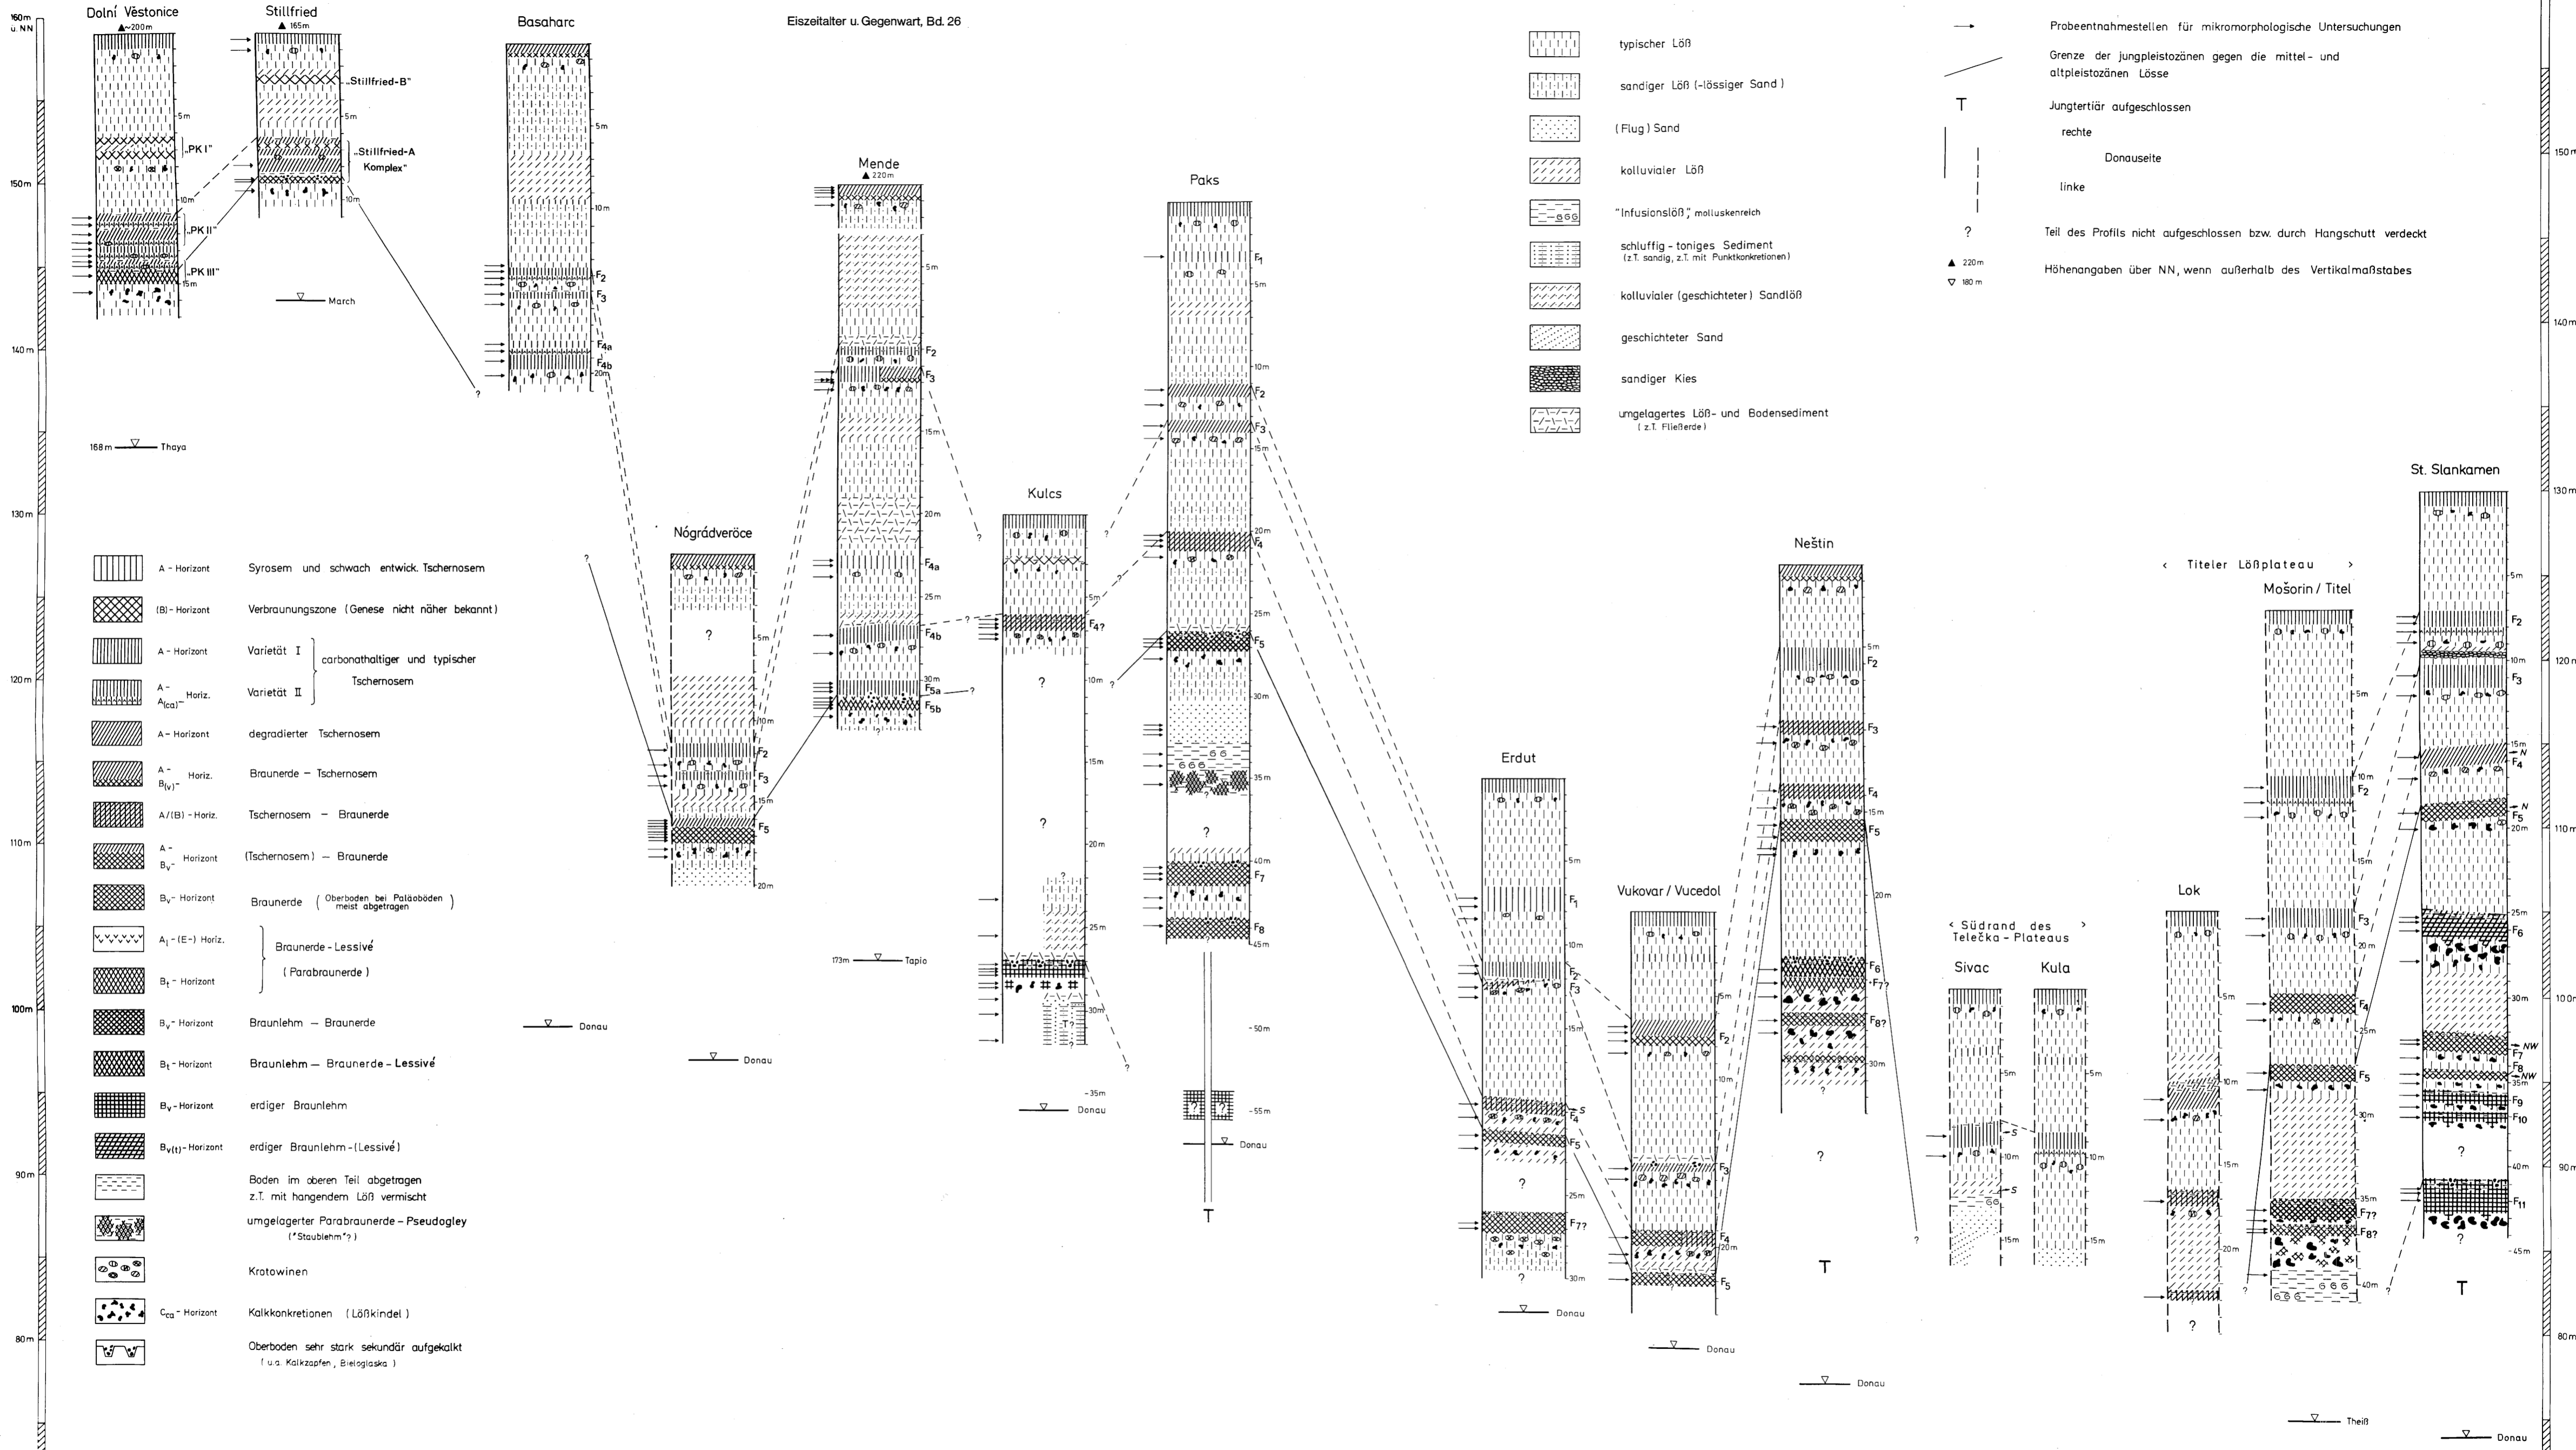

- |  |                                |                                                                        |
|--|--------------------------------|------------------------------------------------------------------------|
|  | A - Horizont                   | Syrosem und schwach entwick. Tschernosem                               |
|  | (B) - Horizont                 | Verbraunungszone (Genese nicht näher bekannt)                          |
|  | A - Horizont                   | Varietät I } carbonathaltiger und typischer Tschernosem                |
|  | A - Horizont                   |                                                                        |
|  | A <sub>(ca)</sub> - Horizont   | Varietät II } Tschernosem                                              |
|  | A - Horizont                   | degradiertes Tschernosem                                               |
|  | A - Horizont                   | Braunerde - Tschernosem                                                |
|  | A/(B) - Horizont               | Tschernosem - Braunerde                                                |
|  | A - Horizont                   | (Tschernosem) - Braunerde                                              |
|  | B <sub>v</sub> - Horizont      | Braunerde (Oberboden bei Paläoböden meist abgetragen)                  |
|  | A <sub>1</sub> - (E-) Horizont | Braunerde - Lessivé (Parabraunerde)                                    |
|  | B <sub>t</sub> - Horizont      |                                                                        |
|  | B <sub>v</sub> - Horizont      | Braunlehm - Braunerde                                                  |
|  | B <sub>t</sub> - Horizont      | Braunlehm - Braunerde - Lessivé                                        |
|  | B <sub>v</sub> - Horizont      | erdiger Braunlehm                                                      |
|  | B <sub>v(t)</sub> - Horizont   | erdiger Braunlehm - (Lessivé)                                          |
|  |                                | Boden im oberen Teil abgetragen z.T. mit hangendem Löß vermischt       |
|  |                                | umgelagerter Parabraunerde - Pseudogley ("Staublehm"?)                 |
|  |                                | Krotowinen                                                             |
|  | C <sub>ca</sub> - Horizont     | Kalkkonkretionen (Lößkindel)                                           |
|  |                                | Oberboden sehr stark sekundär aufgekalkt (u.a. Kalkzapfen, Bielogaska) |

- |  |                                                                        |
|--|------------------------------------------------------------------------|
|  | typischer Löß                                                          |
|  | sandiger Löß (-lössiger Sand)                                          |
|  | (Flug) Sand                                                            |
|  | kolluvialer Löß                                                        |
|  | "Infusionslöß", molluskenreich                                         |
|  | schluffig-toniges Sediment (z.T. sandig, z.T. mit Punktinkonkretionen) |
|  | kolluvialer (geschichteter) Sandlöß                                    |
|  | geschichteter Sand                                                     |
|  | sandiger Kies                                                          |
|  | umgelagertes Löß- und Bodensediment (z.T. Fließerde)                   |

- |  |                                                                        |
|--|------------------------------------------------------------------------|
|  | Probenentnahmestellen für mikromorphologische Untersuchungen           |
|  | Grenze der jungpleistozänen gegen die mittel- und altpleistozänen Löss |
|  | Jungtertiär aufgeschlossen                                             |
|  | rechte Donauseite                                                      |
|  | linke                                                                  |
|  | Teil des Profils nicht aufgeschlossen bzw. durch Hangschutt verdeckt   |
|  | Höhenangaben über NN, wenn außerhalb des Vertikalmaßstabes             |

Abb.1 Lößprofile im Donaauraum zwischen Wien und Belgrad
